# Supplementary material
Source: ML conference proceedings conference paper supplement (https://openaccess.thecvf.com/content/cvpr_2017/html/Pascoe_NID-SLAM_Robust_Monocular_2017_CVPR_paper.html)
Supplement: Supplementary file 2 [file Pascoe_NID-SLAM_Robust_Monocular_2017_CVPR_supplemental.zip]

Archive with 2 entries (2 files):
- NID_SLAM.mp4
- NID_SLAM_Supplementary.pdf
